# Supplementary material
Source: HighWire-hosted journal article supplement (http://molpharm.aspetjournals.org/highwire/filestream/77382/field_highwire_adjunct_files/0/Supplemental_98376.pdf)
Supplement: Supplemental_98376.pdf [file Supplemental_98376.pdf]

## Molecular Pharmacology

### Supplemental Information accompanying the manuscript

#### Preclinical Evaluation of DMA, a Bisbenzimidazole as Radioprotector: Toxicity, Pharmacokinetics and Biodistribution Studies in Balb/c Mice

Hemlata Nimesh, Vinod Tiwari, Chunhua Yang, Sushma R. Gundala, Krishna Chuttani, Puja P. Hazari, Anil K. Mishra, Abhisheak Sharma, Jawahar Lal, Anju Katyal, Ritu Aneja and Vibha Tandon.

Chemical Biology Research Laboratory, Department of Chemistry, University of Delhi (H.N., V.Ti. V.T.), Department of Biology, Georgia State University, Atlanta, GA 30303 (C.Y., S.R.G., R.A.), Dr. Ambedkar Center for Biomedical Research, University of Delhi (A.K.), Division of Cyclotron and Radiopharmaceutical Sciences, Institute of Nuclear Medicine and Allied Sciences, Brig. S. K. Mazumdar Road, Delhi (K.C., P.P.H., A.K.M.), Pharmacokinetics & Metabolism Division, CSIR-Central Drug Research Institute, Lucknow (A.S., J.L.)

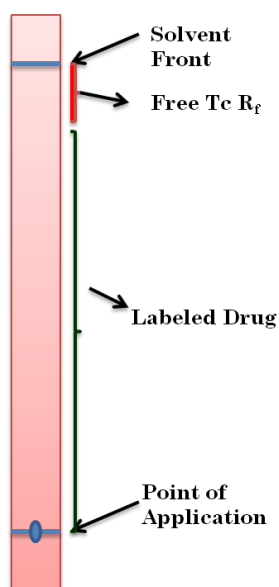

**Supplemental Figure 1.** Instant thin layer chromatography (ITLC) showing the point of application and the distance traveled by <sup>99m</sup>Tc-labeled compound and free Tc.

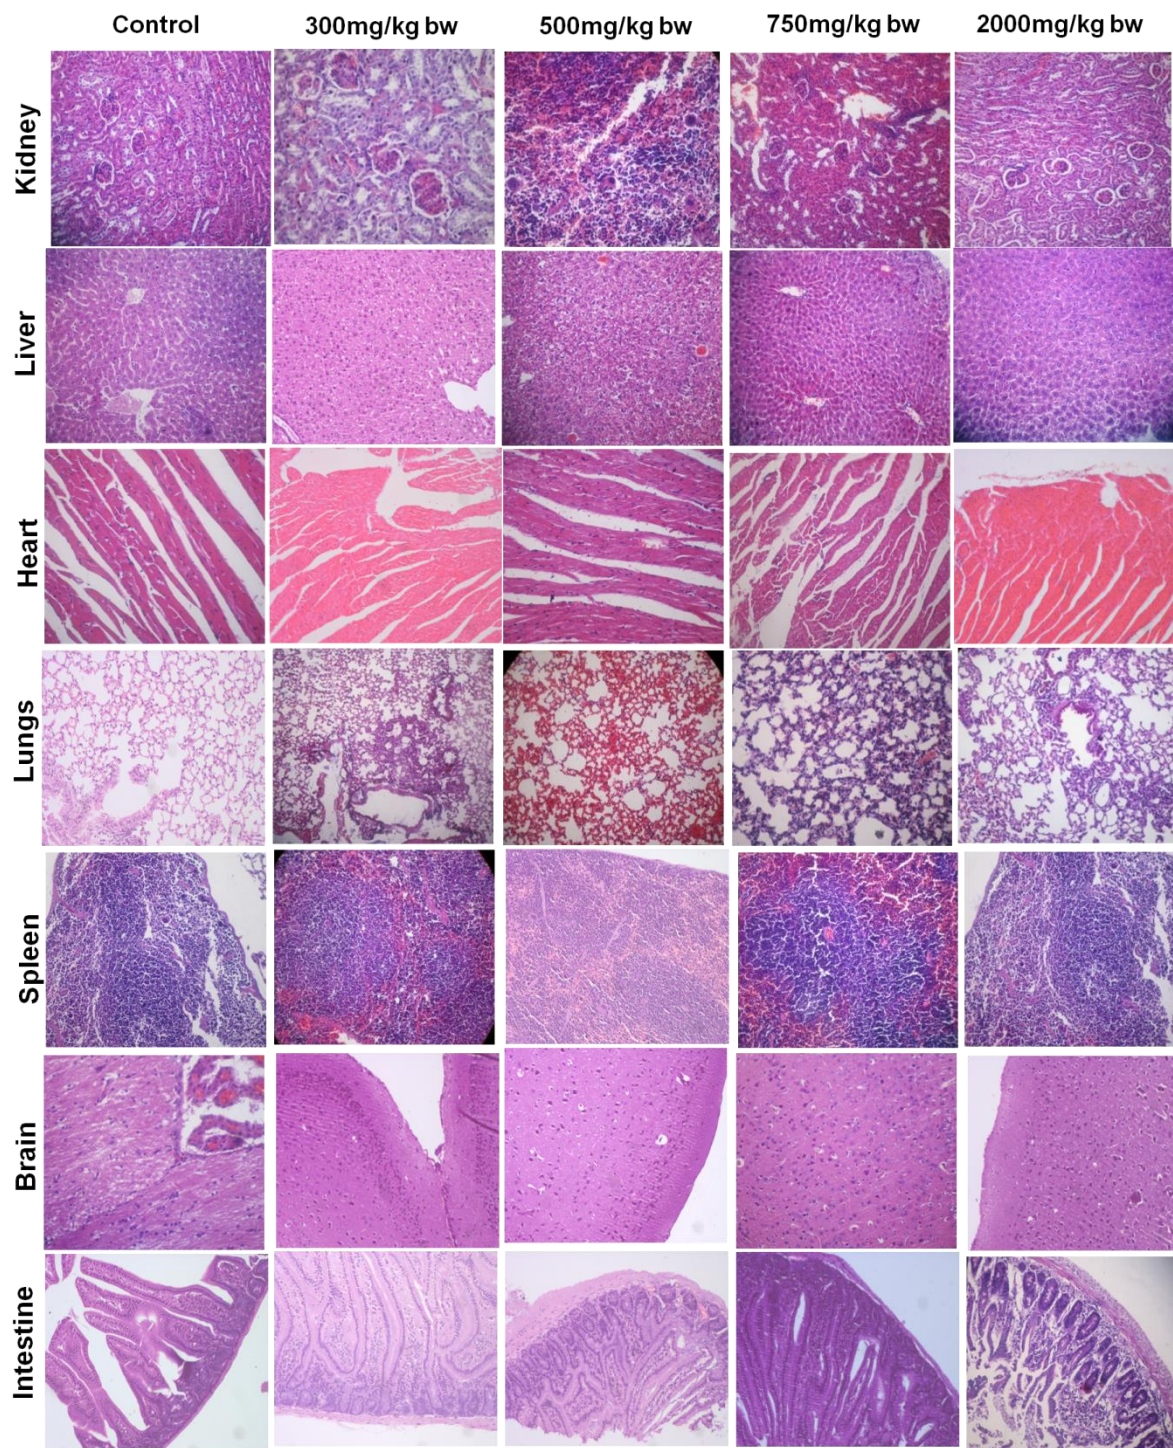

**Supplemental Figure 2.** Tissue histopathological picture of mice treated with the DMA at increasing doses (300, 500, 750, 1500 and 2000mg/kg bw) (H&E, magnification  $\times 200$ ); Kidney, liver, heart, lungs, spleen, brain and intestine of control animals and DMA treated animals.



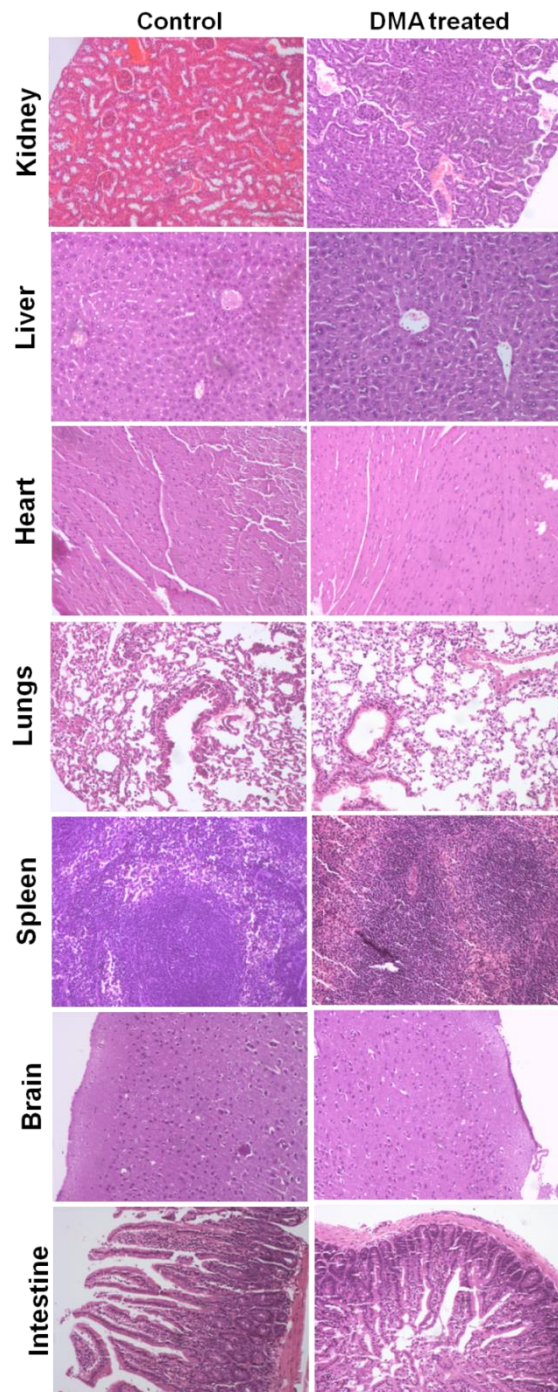

**Supplemental Figure 3.** Tissue histopathological picture of mice treated with the DMA at 225mg/kg bw dose for 28-days (H&E, magnification  $\times 200$ ); Kidney, liver, heart, lungs, spleen, brain and intestine of control animals and DMA treated animals.

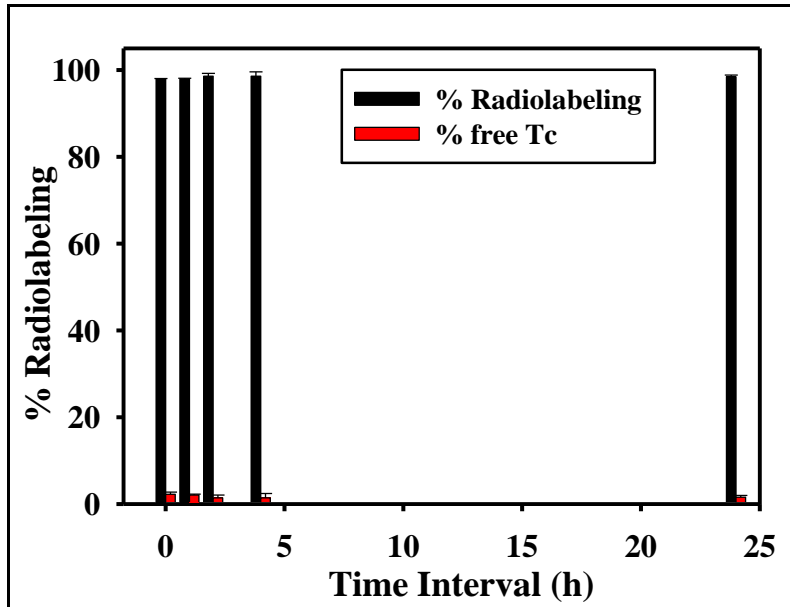

Supplemental Figure 4. *In vitro* stability of  $^{99m}\text{Tc}$ -DMA at 0, 1, 2, 4 and 24h in serum.

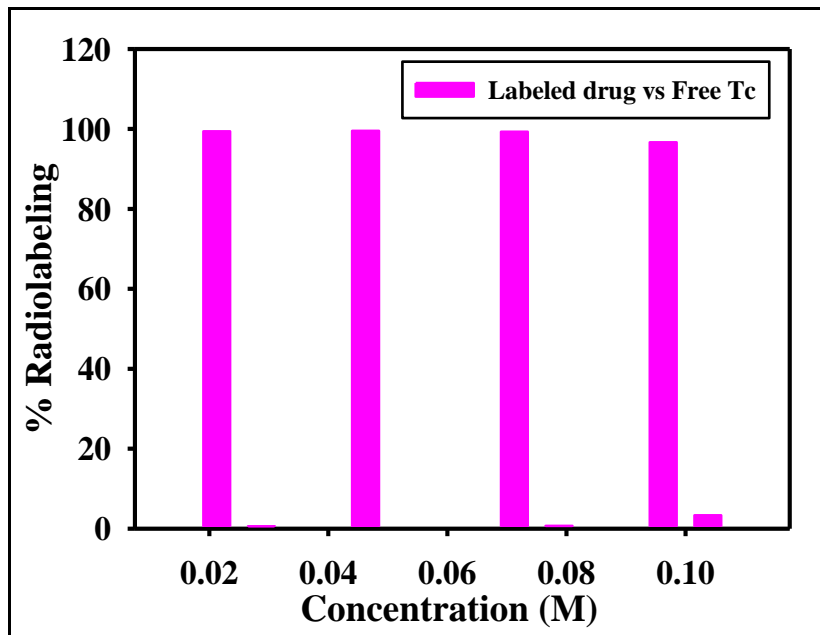

Supplemental Figure 5. Effect of DTPA on radiolabeling efficiency of  $^{99m}\text{Tc}$ -DMA

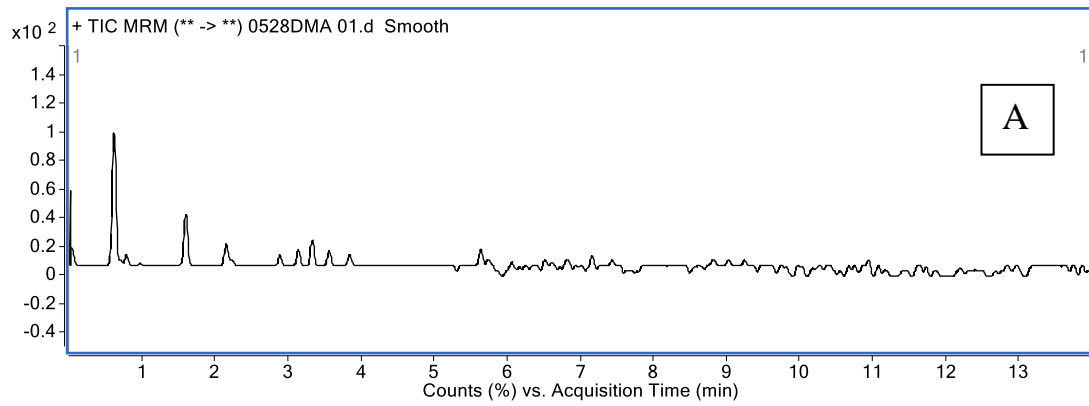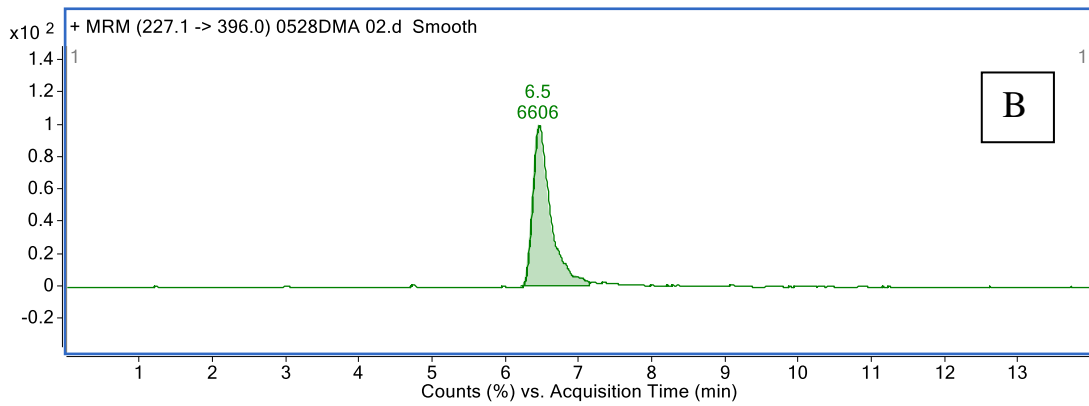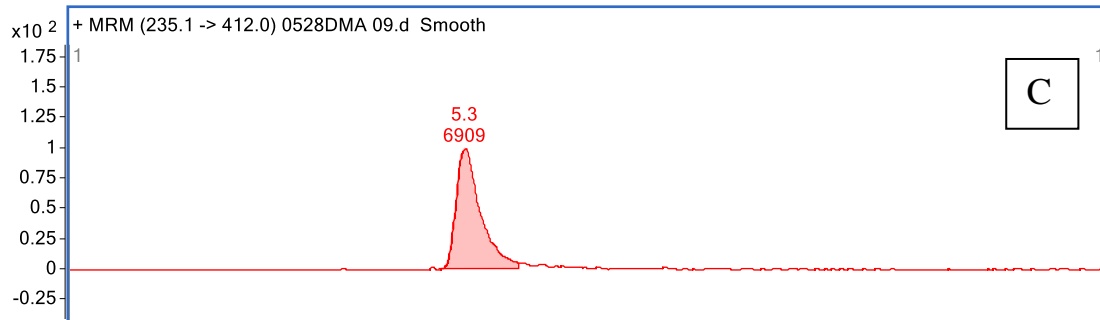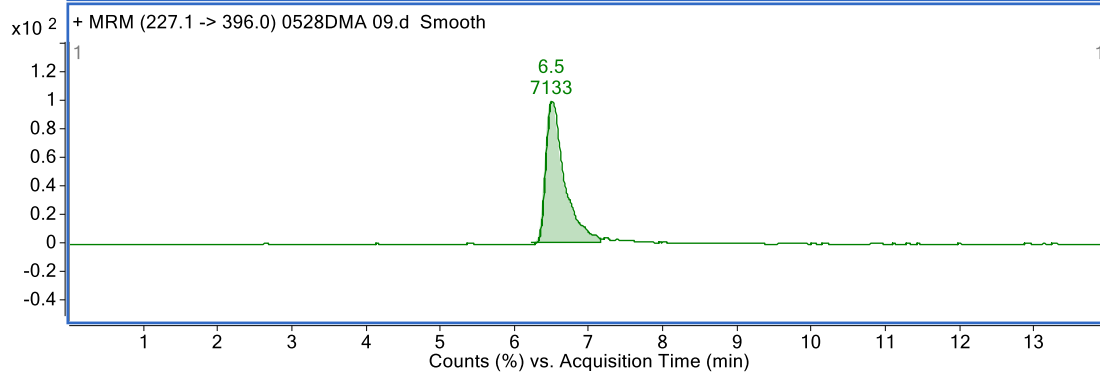

**Supplemental Figure 6.** (A) Blank plasma LC-MS chromatogram; (B) Blank plasma spiked with IS (Hoechst 33342) LC-MS chromatogram; (C) LC-MS chromatogram of the plasma sample spiked with DMA and IS.

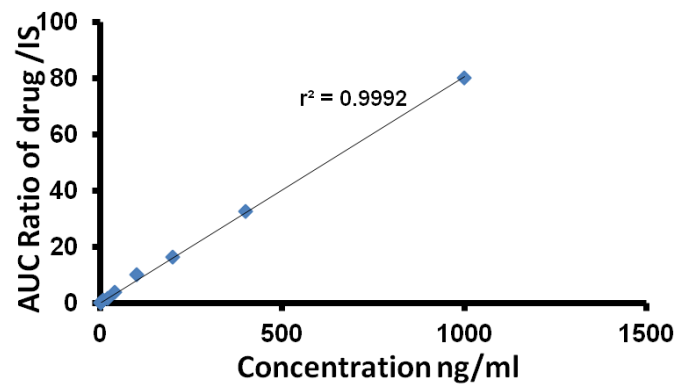

**Supplemental Figure 7.** Calibration curve plotted after injecting the DMA at different concentrations spiked in blank plasma.
